# Supplementary material for: Methanogenesis at High Temperature, High Ionic Strength and Low pH in the Volcanic Area of Dallol, Ethiopia
Source: MDPI journal article supplement (doi:10.3390/microorganisms9061231), 2021-06-06
Supplement: s1 [file s1]

**Table S1. Carbon ( $\delta^{13}\text{C}_{\text{CH}_4}$ ) stable isotopic composition of the methane analyzed in the target samples.**

|                                                 | <b>Sample</b>     | <b><math>\delta^{13}\text{C}_{\text{CH}_4}</math> (‰)*</b> |
|-------------------------------------------------|-------------------|------------------------------------------------------------|
| <i>Yellow<br/>Fumaroles</i>                     | D6 <sub>a</sub>   | $-32.8 \pm 0.3$                                            |
|                                                 | D6 <sub>b</sub>   | $-32.6 \pm 0.7$                                            |
|                                                 | D6S               | $-37.0 \pm 0.6$                                            |
| <i>Blackish<br/>White/Grayish<br/>Fumaroles</i> | FNA1 <sub>a</sub> | $-33.1 \pm 0.6$                                            |
|                                                 | FNA1 <sub>b</sub> | $-33.1 \pm 0.7$                                            |
|                                                 | FNA2              | $-35.8 \pm 0.6$                                            |

\*Values are means  $\pm$  standard deviations
